# Supplementary material
Source: Springer Nature journal article supplement (https://www.springermedizin.de/resource/supplementary/13014_2012_772_MOESM4_ESM.pdf/9634696)

# Use of Bolus by Reconstruction Type and Country

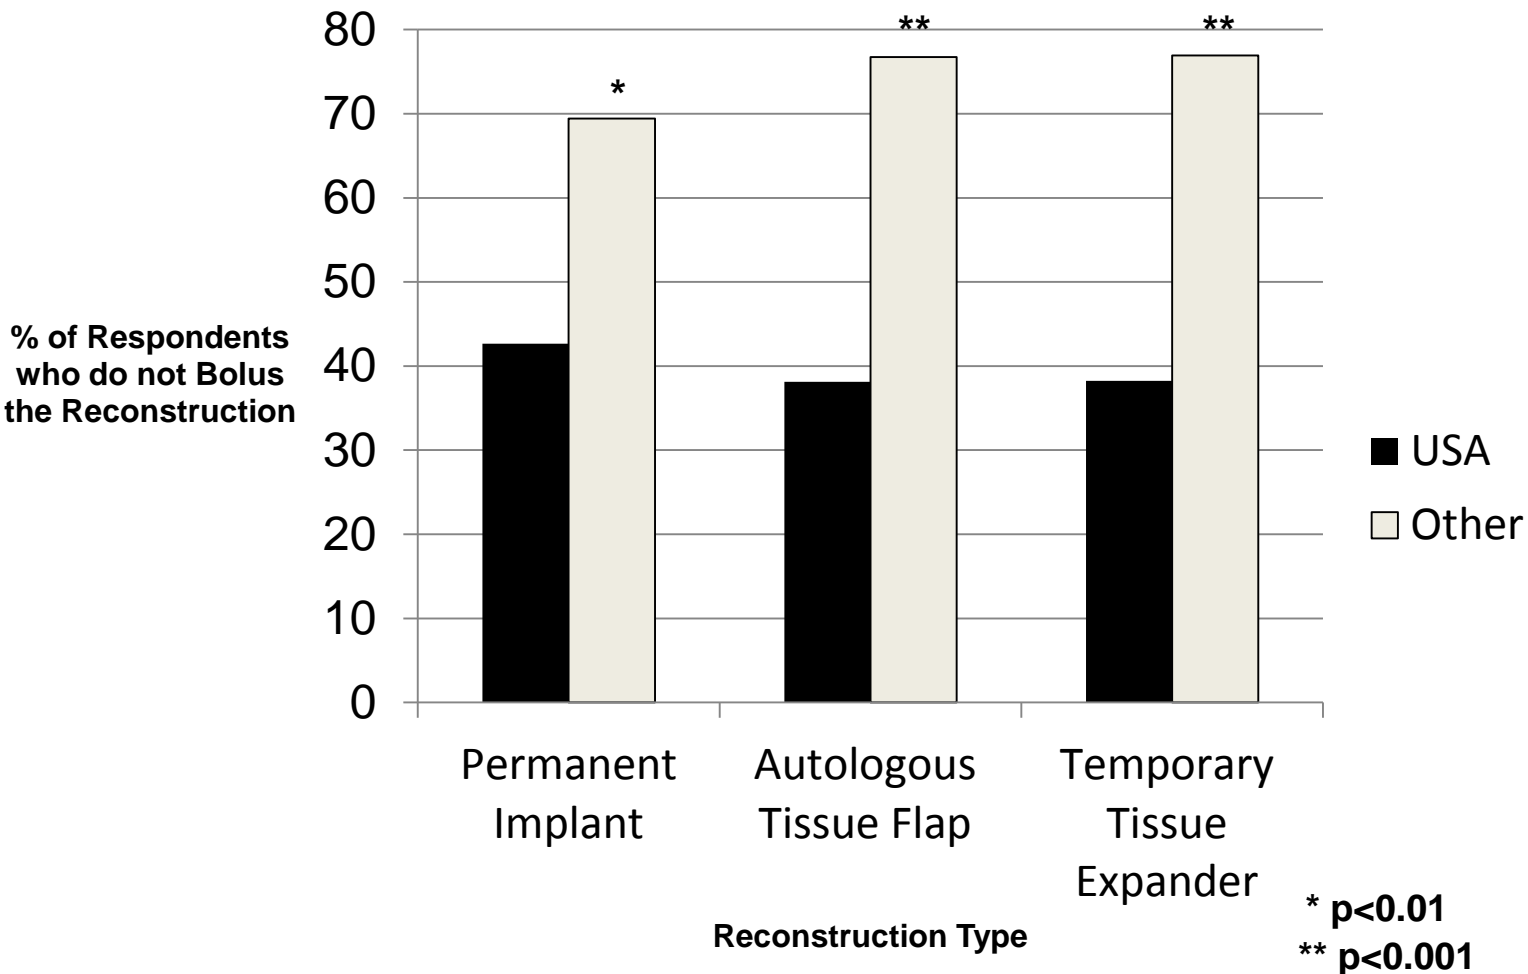

Supplement: MOESM4 [file 9634696]
